# Supplementary material for: Perceptions of racism in healthcare among patients with systemic lupus erythematosus: a cross-sectional study
Source: HighWire-hosted journal article supplement (doi:10.1136/lupus-2015-000110), 2015-08-01
Supplement: lupus-2015-000110supp.pdf [file lupus-2015-000110supp.pdf]

## SUPPLEMENT

Supplement 1. Conceptual model for understanding perceived racism and its effect on SLE-related health outcomes (Adapted from Hammond<sup>13</sup>)

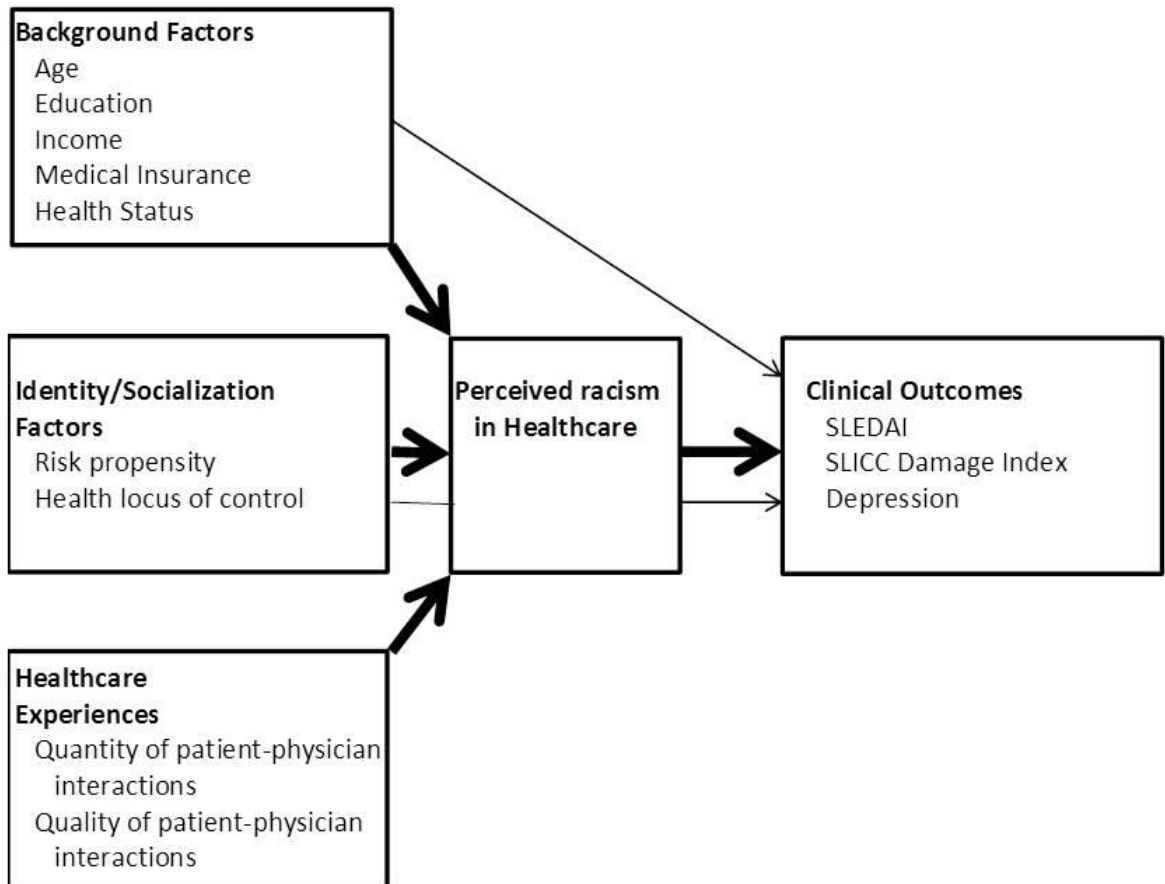

Supplement 2. SLE patient characteristics in relation to perceived racism in healthcare\*

| Characteristic                                       | Low Perceived Racism, n = 193 | High Perceived Racism, n = 150 | P-value†         |
|------------------------------------------------------|-------------------------------|--------------------------------|------------------|
| Race, n(%)                                           |                               |                                | <b>&lt;0.001</b> |
| African-American                                     | 72 (37.3)                     | 91 (60.7)                      |                  |
| White                                                | 121 (62.7)                    | 59 (39.3)                      |                  |
| <b>Background</b>                                    |                               |                                |                  |
| Recruitment Site, n(%)                               |                               |                                | <b>0.013</b>     |
| U Chicago                                            | 91 (47.2)                     | 91 (60.7)                      |                  |
| U Pittsburgh                                         | 102 (52.9)                    | 59 (39.3)                      |                  |
| Age, mean ± SD years                                 | 43.7 ± 13.2                   | 45.6 ± 13.0                    | 0.201            |
| Gender, n(%) female                                  | 175 (90.7)                    | 146 (97.3)                     | <b>0.014</b>     |
| Education, n(%)                                      |                               |                                | <b>&lt;0.001</b> |
| Less than HS graduate                                | 11 (5.7)                      | 5 (3.3)                        |                  |
| HS graduate                                          | 57 (29.5)                     | 18 (12.0)                      |                  |
| More than HS graduate                                | 125 (64.8)                    | 127 (84.7)                     |                  |
| Income, n(%)                                         |                               |                                | 0.193            |
| <\$10000                                             | 40 (20.9)                     | 28 (19.1)                      |                  |
| \$10001-30000                                        | 44 (23.0)                     | 29 (19.7)                      |                  |
| \$30001-50000                                        | 27 (14.1)                     | 29 (19.7)                      |                  |
| >\$50000                                             | 75 (39.2)                     | 61 (41.5)                      |                  |
| Employed, n(%)                                       | 82 (42.5)                     | 77 (51.3)                      | 0.192            |
| With Private Medical Insurance, n(%)                 | 124 (64.3)                    | 92 (61.3)                      | 0.579            |
| Marital Status, n(%) married                         | 98 (50.8)                     | 83 (55.3)                      | 0.402            |
| SLE Disease Duration, mean ± SD months               | 117.5 ± 109.4                 | 122.4 ± 116.1                  | 0.740            |
| Charlson Comorbidity Index, mean ± SD                | 2.09 ± 1.31                   | 2.21 ± 1.40                    | 0.396            |
| <b>Identity/Socialization</b>                        |                               |                                |                  |
| DOSPRT, mean ± SD                                    | 16.4 ± 4.4                    | 17.3 ± 4.8                     | 0.059            |
| Health locus of control, mean ± SD                   |                               |                                |                  |
| Internal                                             | 25.3 ± 4.9                    | 24.1 ± 5.5                     | <b>0.041</b>     |
| Chance                                               | 18.6 ± 5.6                    | 17.9 ± 5.6                     | 0.237            |
| Powerful others                                      | 25.3 ± 5.3                    | 23.6 ± 9.5                     | <b>0.037</b>     |
| <b>Healthcare experiences</b>                        |                               |                                |                  |
| Physician-patient relation duration, mean ± SD years | 5.3 ± 5.4                     | 5.0 ± 4.6                      | 0.581            |
| Duration of clinic follow-up, mean ± SD years        | 8.1 ± 7.4                     | 7.5 ± 6.2                      | 0.392            |
| Physician's PDM style, mean ± SD                     | 73.7 ± 23.5                   | 67.3 ± 25.4                    | <b>0.016</b>     |
| Trust in physicians, mean ± SD                       | 42.1 ± 7.3                    | 34.3 ± 7.1                     | <b>&lt;0.001</b> |

\*High (vs. low) perceived racism was defined as having an index score of >10 (vs. ≤10)

†Significance level of the  $\chi^2$  (or Fisher's exact) statistic for categorical variables and 2-tailed t-test (or Wilcoxon's rank sum test) for continuous variables.

HS, High School; PDM: Participatory decision-making.
